# Supplementary material for: Dual effects of biochar and hyperaccumulator Solanum nigrum L. on the remediation of Cd-contaminated soil
Source: PeerJ. 2019 Mar 25;7:e6631. doi: 10.7717/peerj.6631 (PMC6438157; doi:10.7717/peerj.6631)
Supplement: Data S1 [file peerj-07-6631-s002.xlsx]

## Sheet: urease
Treatments	CK	T2	T3	T4	T5	T6	T7	T8	T9	T10	T11	T12
Biochar(w/w,%)	0	1	5	0	1	5	0	1	5	0	1	5
Cd（mg/kg)	0	0	0	25	25	25	50	50	50	100	100	100
urease
Treatments	OD1	OD2	OD3
CK	0.129	0.132	0.123
T2	0.338	0.338	0.383
T3	0.426	0.438	0.434
T4	0.402	0.361	0.403
T5	0.415	0.442	0.485
T6	0.403	0.393	0.421
T7	0.334	0.322	0.345
T8	0.341	0.349	0.362
T9	0.498	0.531	0.485
T10	0.371	0.385	0.426
T11	0.433	0.438	0.442
T12	0.383	0.352	0.401

## Sheet: sucrase
Treatments	CK	T2	T3	T4	T5	T6	T7	T8	T9	T10	T11	T12
Biochar(w/w,%)	0	1	5	0	1	5	0	1	5	0	1	5
Cd（mg/kg)	0	0	0	25	25	25	50	50	50	100	100	100
Sucrase
Treatments	OD1	OD2	OD3
CK	0.16	0.161	0.165
T2	0.165	0.158	0.157
T3	0.158	0.16	0.164
T4	0.157	0.161	0.162
T5	0.157	0.159	0.161
T6	0.152	0.153	0.157
T7	0.162	0.159	0.16
T8	0.161	0.159	0.16
T9	0.155	0.155	0.156
T10	0.153	0.152	0.153
T11	0.151	0.151	0.145
T12	0.155	0.15	0.155

## Sheet: phosphatase
Treatments	CK	T2	T3	T4	T5	T6	T7	T8	T9	T10	T11	T12
Biochar(w/w,%)	0	1	5	0	1	5	0	1	5	0	1	5
Cd（mg/kg)	0	0	0	25	25	25	50	50	50	100	100	100
Acid phosphatase
Treatments	OD1	OD2	OD3
CK	1.446	1.425	1.427
T2	1.424	1.148	1.151
T3	1.328	1.329	1.338
T4	1.258	1.269	1.262
T5	1.127	1.139	1.135
T6	1.078	1.081	1.08
T7	1.922	1.913	1.92
T8	1.956	1.1951	1.971
T9	1.951	1.959	1.981
T10	1.984	1.993	1.996
T11	1.92	1.925	1.92
T12	1.91	1.91	1.912

## Sheet: EC
Treatments	CK	T2	T3	T4	T5	T6	T7	T8	T9	T10	T11	T12
Biochar(w/w,%)	0	1	5	0	1	5	0	1	5	0	1	5
Cd（mg/kg)	0	0	0	25	25	25	50	50	50	100	100	100
EC
Treatments				us/cm
CK	136.9	105.3	124.5
T2	112.1	132.2	128.2
T3	232	203	233
T4	102.1	152.5	142.6
T5	135.2	119.2	129.4
T6	244	244	236
T7	134.5	151.1	141.3
T8	153.1	137.6	163.9
T9	320	262	241
T10	171.1	139.9	137.4
T11	183.3	197.4	155.6
T12	272	424	364

## Sheet: pH
Treatments	CK	T2	T3	T4	T5	T6	T7	T8	T9	T10	T11	T12
Biochar(w/w,%)	0	1	5	0	1	5	0	1	5	0	1	5
Cd（mg/kg)	0	0	0	25	25	25	50	50	50	100	100	100
pH
Treatments
CK
T2
T3
T4	6.93	7.02	6.97	7.46
T5	7.29	6.9	6.92	6.83
T6	6.94	6.78	6.84	6.85
T7	7.07	7.13	7.07	7.07
T8	7.23	7.46	7.41	7.42
T9	6.69	6.73	6.84	6.74
T10	6.89	6.72	6.77	6.79
T11	7.01	7.02	7.02	7.01
T12	7.27	7.3	7.34	7.3

## Sheet: soc
Treatments	CK	T2	T3	T4	T5	T6	T7	T8	T9	T10	T11	T12
Biochar(w/w,%)	0	1	5	0	1	5	0	1	5	0	1	5
Cd（mg/kg)	0	0	0	25	25	25	50	50	50	100	100	100
SOC
Treatments
CK	10.0571	13.1371	8.67429
T2	16.9714	15.7143	14.4571
T3	15.0857	14.4571	19.4857
T4	13.8286	18.8571	15.7143
T5	16.9714	25.7714	19.4857
T6	20.1143	26.4	22
T7	11.4286	11.9714	11.7143
T8	19.57	18.2429	20.5286
T9	19.3814	19.7657	18.2414
T10	19.4757	16.91	19.9543
T11	19.342	19.7643	19.7643
T12	17.765	19.19	18.7143

## Sheet: Cd
Treatments	CK	T2	T3	T4	T5	T6	T7	T8	T9	T10	T11	T12
Biochar(w/w,%)	0	1	5	0	1	5	0	1	5	0	1	5
Cd（mg/kg)	0	0	0	25	25	25	50	50	50	100	100	100
Available cadmium
Treatments	OD1	OD2	OD3
CK	-0.0355	-0.0128	-0.0059
T2	-0.0004	-0.0014	-0.0014
T3	-0.0038	-0.0038	-0.004
T4	0.018	0.0226	0.0237
T5	0.0348	0.0237	0.028
T6	0.027	0.0216	0.0244
T7	0.0869	0.0482	0.0466
T8	0.0534	0.0394	0.0334
T9	0.0439	0.0318	0.0412
T10	0.0476	0.0354	0.042
T11	0.0318	0.0277	0.0212
T12	0.0142	0.0114	0.0129

## Sheet: shoots(Cd)
Treatments	CK	T2	T3	T4	T5	T6	T7	T8	T9	T10	T11	T12
Biochar(w/w,%)	0	1	5	0	1	5	0	1	5	0	1	5
Cd（mg/kg)	0	0	0	25	25	25	50	50	50	100	100	100
Treatments	OD1	OD2	OD3
CK				Plant heavy metal(shoots)
T2
T3
T4	0.0732	0.0508	0.0752
T5	0.0768	0.044	0.0582
T6	0.0552	0.0605	0.0599
T7	0.0697	0.086	0.0633
T8	0.0862	0.0874	0.086
T9	0.1026	0.0882	0.0861
T10	0.1338	0.1414	0.0902
T11	0.1328	0.1216	0.1115
T12	0.1152	0.1093	0.1262

## Sheet: roots(Cd)
Treatments	CK	T2	T3	T4	T5	T6	T7	T8	T9	T10	T11	T12
Biochar(w/w,%)	0	1	5	0	1	5	0	1	5	0	1	5
Cd（mg/kg)	0	0	0	25	25	25	50	50	50	100	100	100
Treatments	OD1	OD2	OD3		Plant heavy metal(roots)
CK
T2
T3
T4	0.264	0.2842	0.2452
T5	0.4219	0.4146	0.4001
T6	0.3266	0.3986	0.3459
T7	0.3459	0.897	0.7064
T8	0.6791	0.7477	0.6411
T9	0.4892	0.9543	0.4902
T10	0.6998	0.4759	1.6632
T11	0.9996	1.3861	1.1928
T12	1.2695	1.1309	1.2002

## Sheet: plant weight (dw)
Treatments	CK	T2	T3	T4	T5	T6	T7	T8	T9	T10	T11	T12
Biochar(w/w,%)	0	1	5	0	1	5	0	1	5	0	1	5
Cd（mg/kg)	0	0	0	25	25	25	50	50	50	100	100	100
Dry weight of roots
Treatments					g
CK	0.689	0.614	0.4497	0.396
T2	0.585	0.5398	0.7128	0.4879
T3	0.6608	0.3773	0.5999	0.947
T4	0.6529	0.2892	0.5213	0.3001
T5	0.5233	0.5884	0.2865	0.5778
T6	0.5835	0.3064	0.3623	0.3623
T7	0.0824	0.1294	0.3242	0.2281
T8	0.251	0.3702	0.22	0.4953
T9	0.3541	0.2568	0.2667	0.2613
T10	0.0303	0.0264	0.0713	0.0604
T11	0.3749	0.0674	0.0784	0.3035
T12	0.1063	0.1016	0.0791	0.084
Dry weight of stems
Treatments					g
CK	0.4851	0.5481	0.4672	0.5355
T2	0.8225	1.0433	1.1071	0.8536
T3	1.1025	0.9865	1.2672	1.2801
T4	0.3811	1.1058	0.7085	1.0222
T5	0.9157	1.2761	0.6622	1.1728
T6	1.1814	0.9207	0.8569	0.8864
T7	0.3073	0.399	0.5843	0.5217
T8	0.7404	2.3981	0.7347	2.1681
T9	0.733	0.7617	0.687	0.6908
T10	0.0462	0.0941	0.1287	0.0984
T11	0.3749	0.0674	0.0784	0.3035
T12	0.1063	0.0791	0.1016	0.084
Dry weight of leafs
Treatments					g
CK	0.956	0.9221	0.9913	1.009
T2	1.0765	1.1369	1.1566	1.1367
T3	1.0285	0.943	1.0736	1.1462
T4	0.6742	1.1033	0.9109	1.1156
T5	1.0274	1.2727	0.8855	1.1185
T6	1.0191	1.0288	0.6275	0.659
T7	0.5853	0.6901	1.0018	0.9546
T8	0.9112	1.1326	0.9937	1.1495
T9	0.9109	0.8323	0.8537	0.9522
T10	0.0987	0.1112	0.2903	0.2028
T11	0.7191	0.383	0.4291	0.6769
T12	0.362	0.248	0.3631	0.2073

[truncated: 2 more sheets: HEIGHT, N]
